# Supplementary material
Source: publisher site journal article supplement (https://www.dovepress.com/article/298261)

## Figure legends

### Supplementary file 1.

The significant differences of KEGG pathways between naive mice and the untreated intracranial glioma mice using Welch's T-test. \*  $P < 0.05$ , \*\*  $P < 0.01$ . \*\*\*  $P < 0.001$ .

### Supplementary file 2.

Kruskal-Wallis test was used to find the genus with significant difference between groups from T0 to T3 in vehicle group. The result of RQ was showed. T0: day1, T1: day7, T2: day14, T3: day28. \*  $P < 0.05$ , \*\*  $P < 0.01$ . \*\*\*  $P < 0.001$ .

### Supplementary file 3.

The significant differences of KEGG pathways between TMZ group and vehicle group at T2 using Welch's T-test. \*  $P < 0.05$ , \*\*  $P < 0.01$ . \*\*\*  $P < 0.001$ .

### Supplementary file 4.

The significant differences of KEGG pathways between TMZ group and vehicle group at T3 using Welch's T-test. \*  $P < 0.05$ .

### Supplementary file 5.

T0: day1, T1: day7, T2: day14, T3: day28. Kruskal-Wallis test was used to find the genus with significant difference between groups from T0 to T3 in TMZ group. The result of RQ was showed. \*  $P < 0.05$ , \*\*  $P < 0.01$ .

Supplementary file 1.

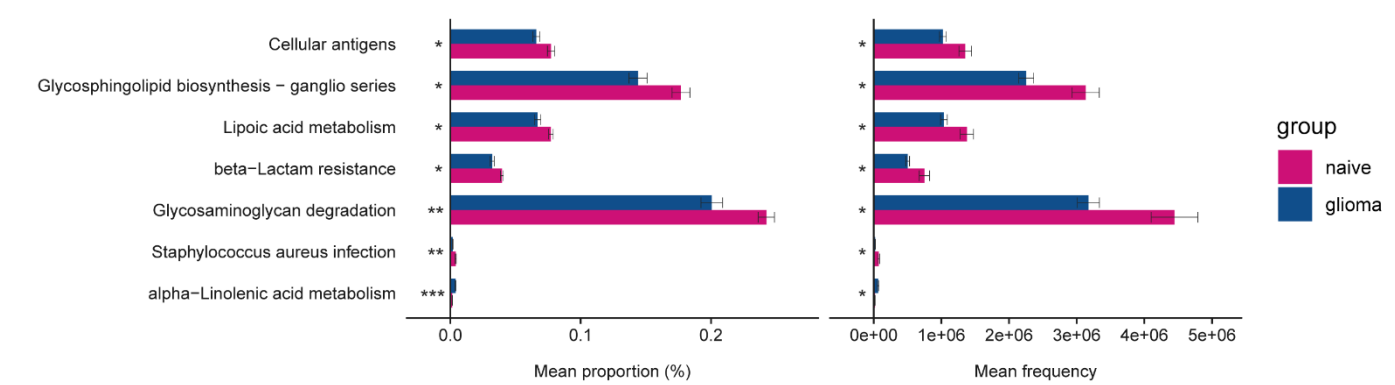

Supplementary file 2

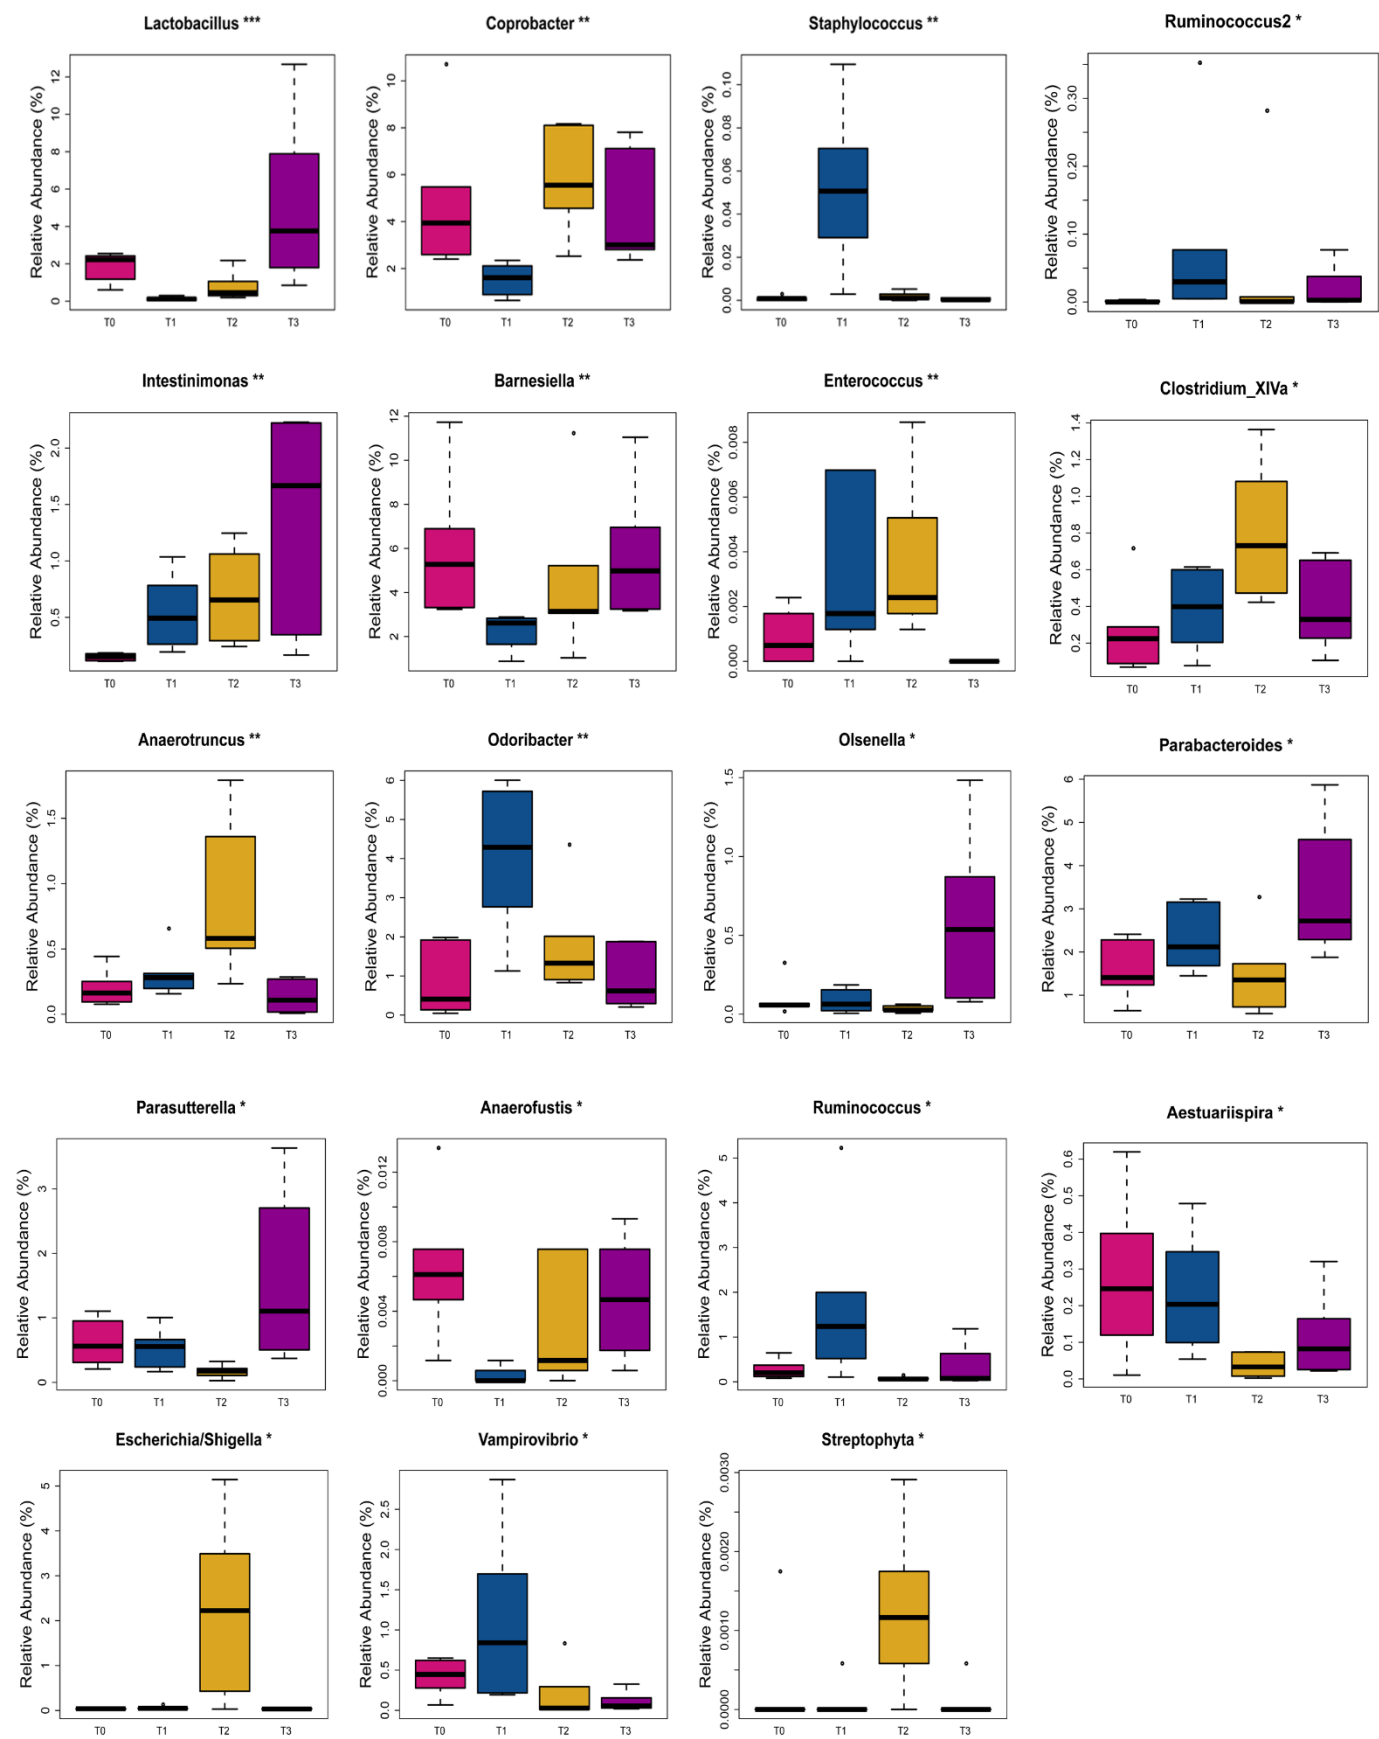

Supplementary file 3

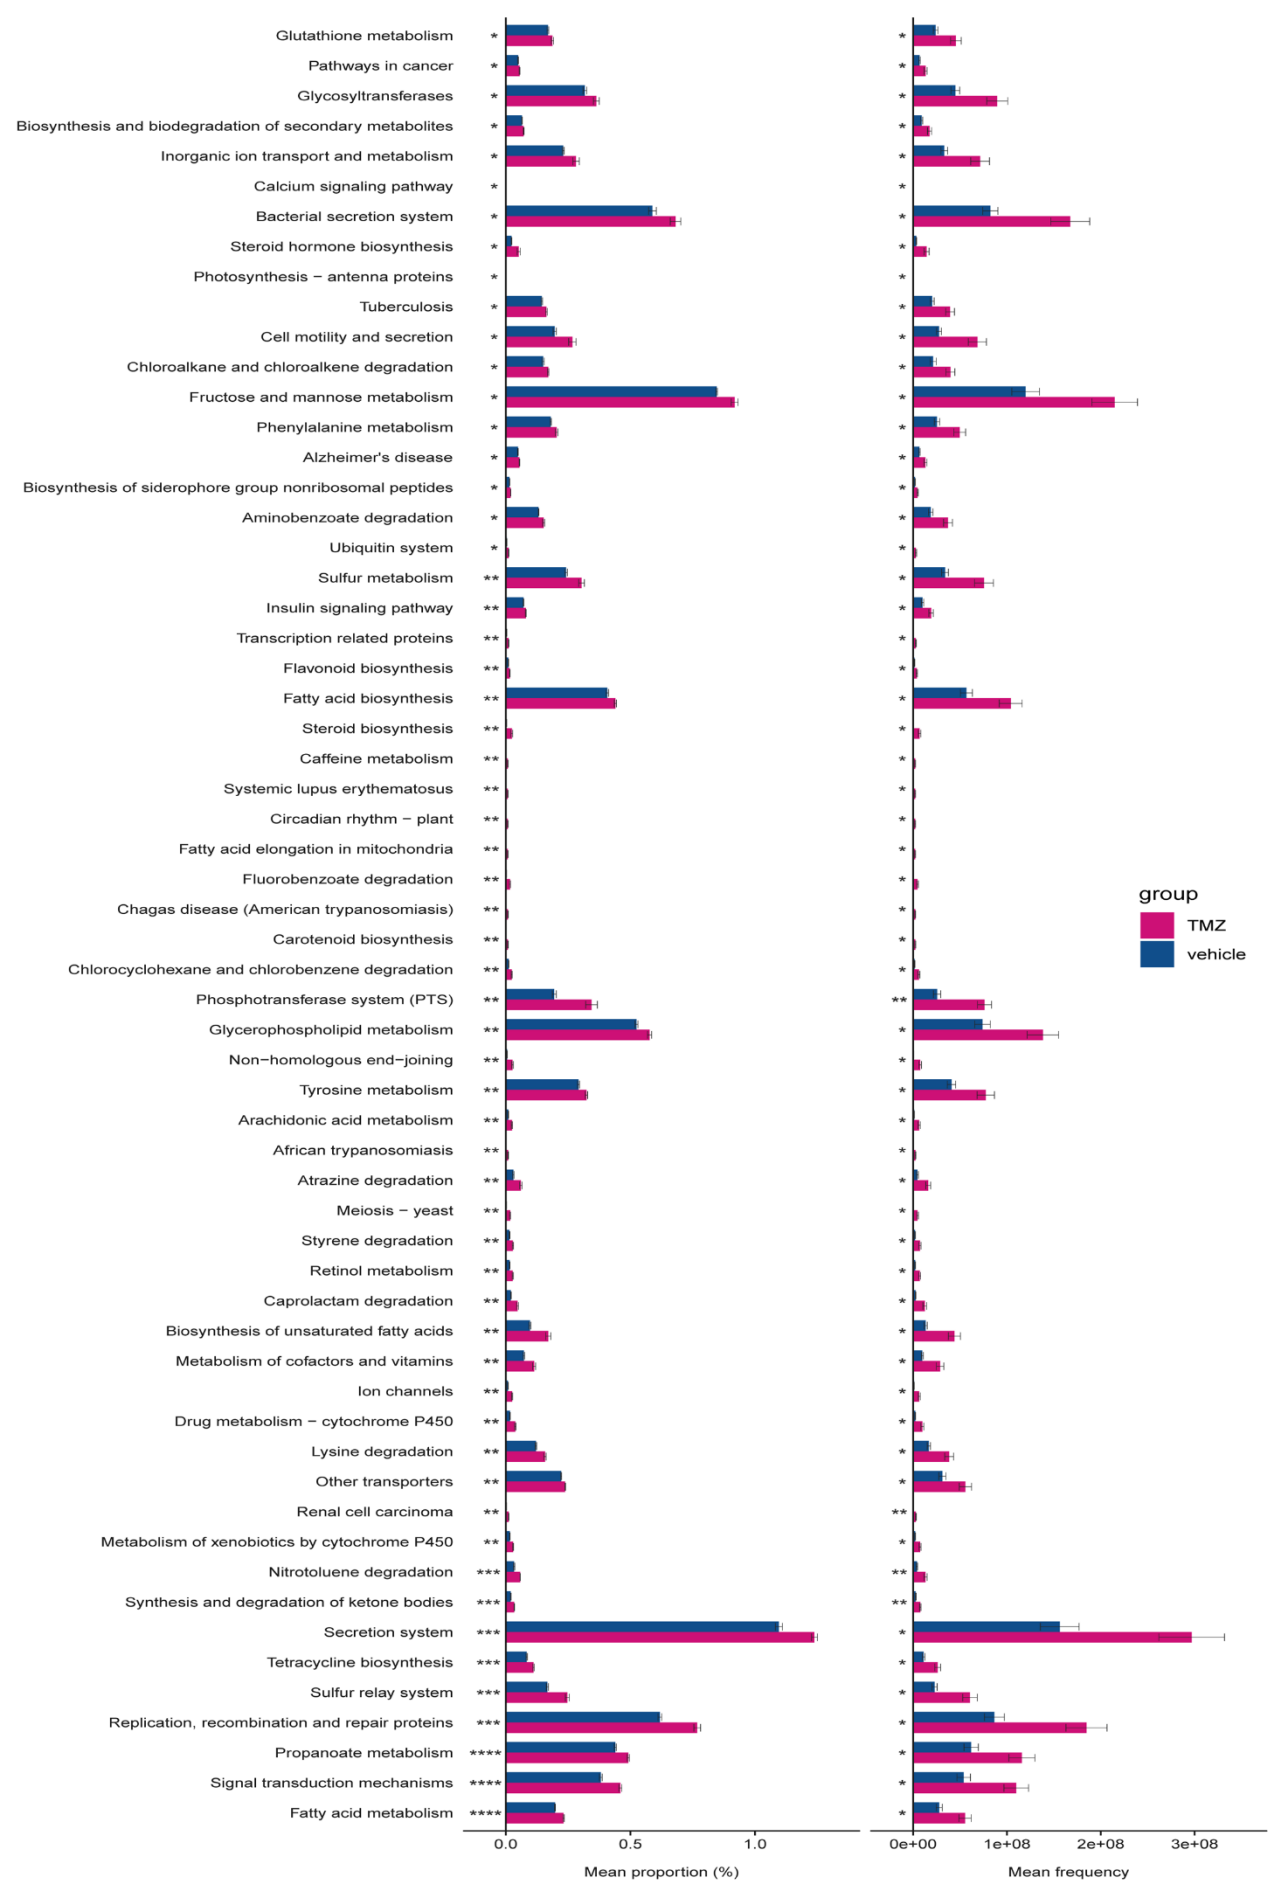

Supplementary file 4

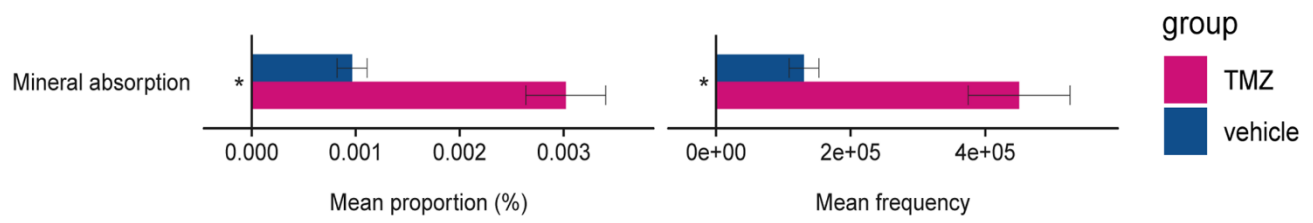

## Supplementary file 5

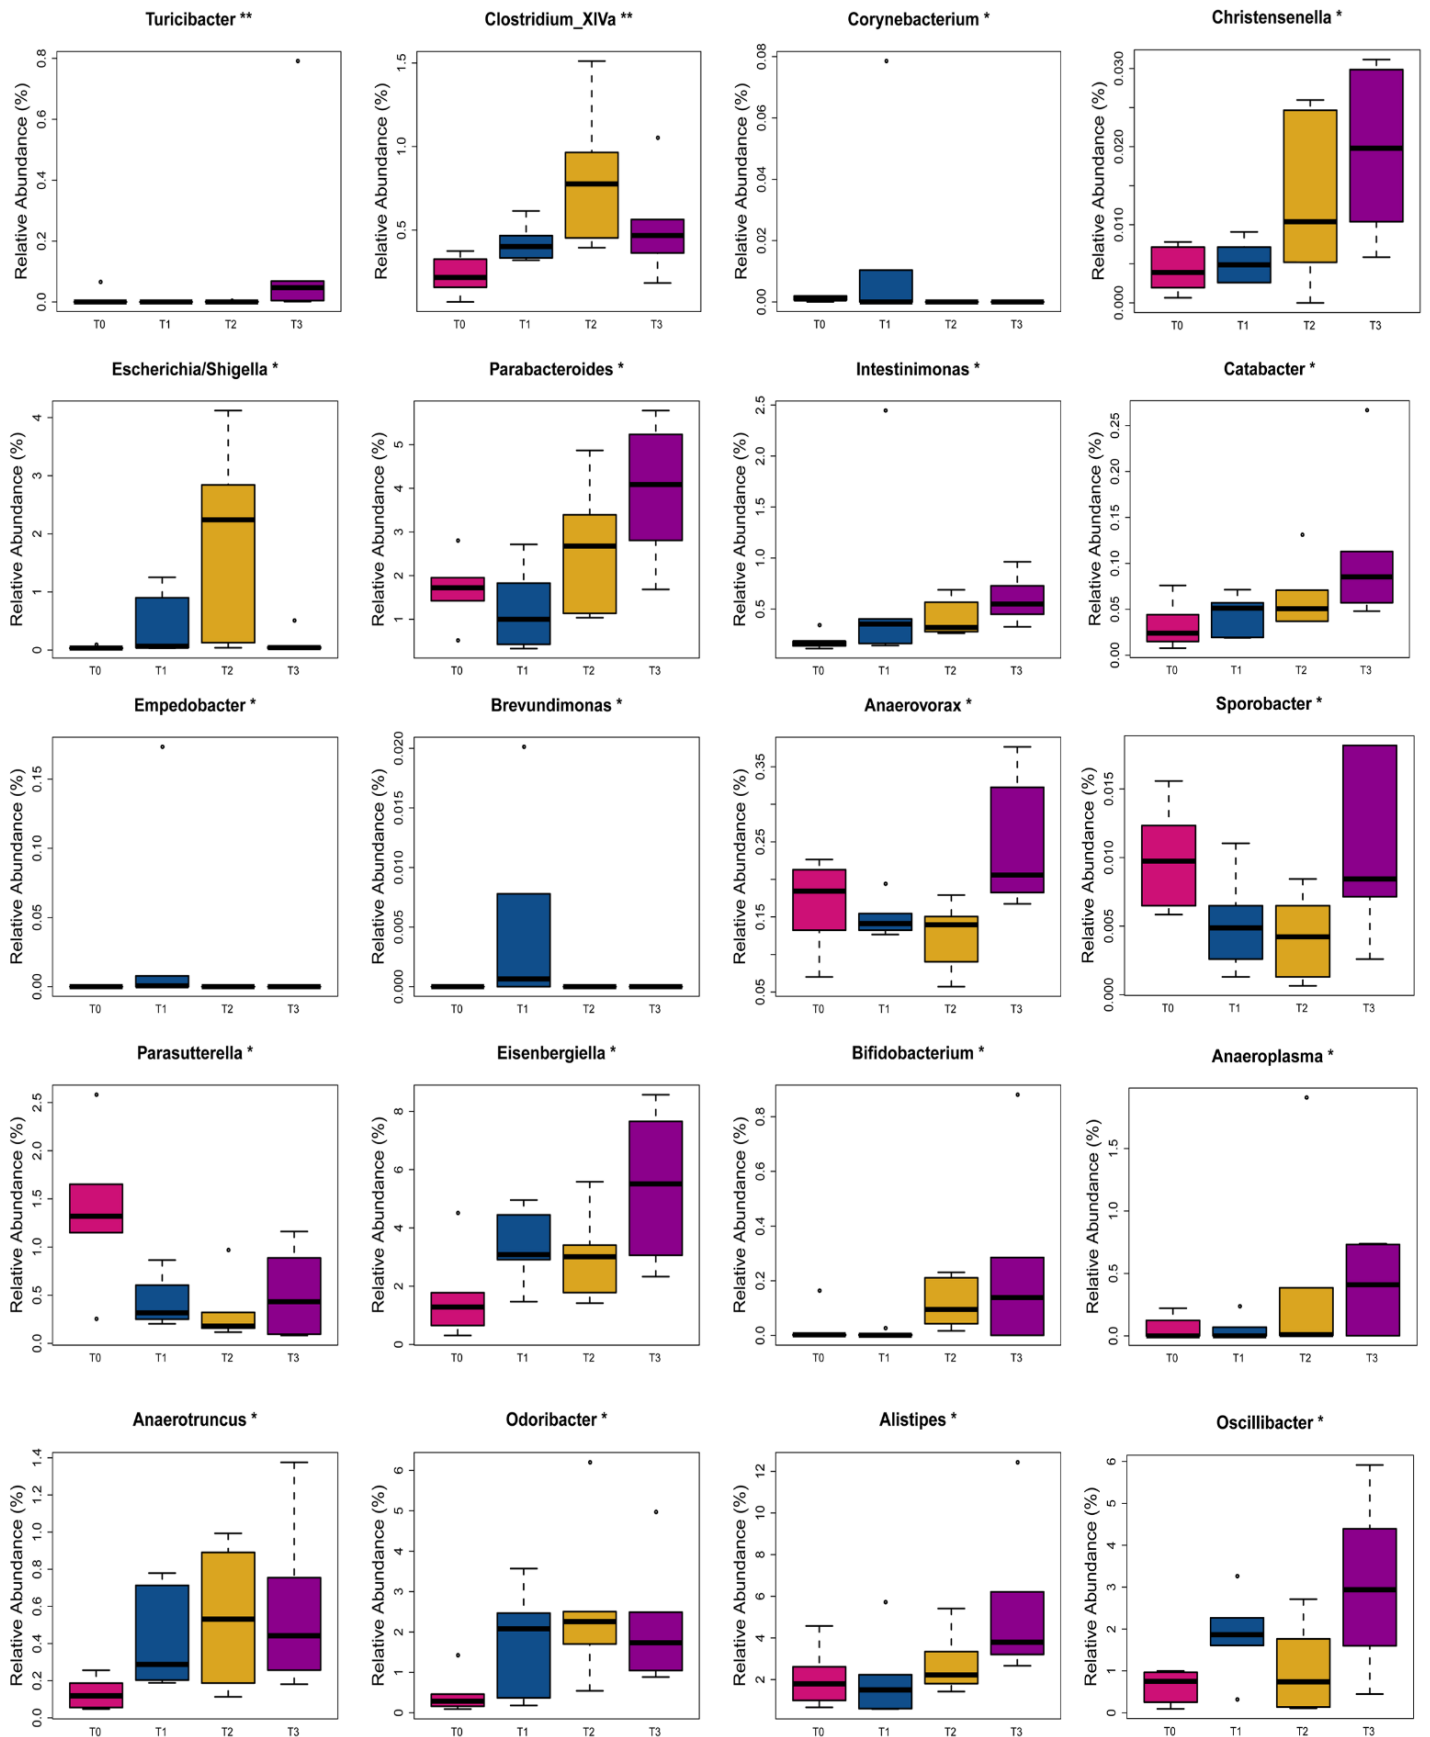

Supplement: Supplementary file 1 [file get_supplementary_file.php]
